# Supplementary material
Source: Springer Nature journal article supplement (https://www.springermedizin.de/resource/supplementary/12348_2012_39_MOESM2_ESM.pdf/9673316)
Supplement: MOESM2 [file 9673316]

Supplemental Table 2. Rescue Criteria

| <b>Rescue Criteria</b>                                                                                                                                                                                                                                                                                                                                                                                                                                                                                                                                                                                                                                                                                                                                                                                                                                                                                                                                                                                                                                       |  |  |
|--------------------------------------------------------------------------------------------------------------------------------------------------------------------------------------------------------------------------------------------------------------------------------------------------------------------------------------------------------------------------------------------------------------------------------------------------------------------------------------------------------------------------------------------------------------------------------------------------------------------------------------------------------------------------------------------------------------------------------------------------------------------------------------------------------------------------------------------------------------------------------------------------------------------------------------------------------------------------------------------------------------------------------------------------------------|--|--|
| <b><u>Rescue therapy will be offered if one or more of the following conditions are met:</u></b>                                                                                                                                                                                                                                                                                                                                                                                                                                                                                                                                                                                                                                                                                                                                                                                                                                                                                                                                                             |  |  |
| <ol style="list-style-type: none"><li>1. If the study eye shows no response for at least 2 months following the third scheduled injection of sirolimus (i.e., at Month 6).</li><li>2. Worsening of primary disease in the study eye at least 1 month following the third scheduled injection of sirolimus (i.e., at Month 6) as indicated by at least a 2 point increase in Vitreous Haze or Vitreous Cell Count as compared to Baseline.</li><li>3. If the fellow eye shows no response for at least 2 months following the last sirolimus injection in the fellow eye despite at least 1 sirolimus injection;</li><li>4. Worsening of primary disease in the fellow eye at least 1 month following the last sirolimus injection in the fellow eye as indicated by at least a 2 point increase in Vitreous Haze or Vitreous Cell Count and as compared to Baseline despite at least 1 sirolimus injection;</li><li>5. Severe deterioration of vision in either eye as indicated by at least doubling of the visual angle as compared to Baseline.</li></ol> |  |  |
| <ul style="list-style-type: none"><li>▪ <i>Conditions that can explain the deterioration of vision, other than the primary disease (e.g. cataract), must be excluded before rescue therapy is allowed.</i></li><li>▪ <i>Rescue therapy will be offered once deterioration of vision or worsening of primary disease has been confirmed at least 1 month following the last sirolimus injection.</i></li></ul>                                                                                                                                                                                                                                                                                                                                                                                                                                                                                                                                                                                                                                                |  |  |
